# Supplementary material
Source: PubMed Central journal article supplement (PMC2876487)
Supplement: supp_192_11_2908__1.pdf [file supp_192_11_2908__1.pdf]

## Supplemental table S1.

| Organism                                          | Phylum; Class                               | Toxin                  |           | Antitoxin       | gap (bp)    |
|---------------------------------------------------|---------------------------------------------|------------------------|-----------|-----------------|-------------|
|                                                   |                                             | Locus                  | gi        |                 |             |
| <i>Acidobacteria bacterium</i> Ellin345           | Acidobacteria;<br>Acidobacteriales          | Acid345_4147           | 94971173  | Acid345_4148    | -1 overlap  |
| <i>Nitrobacter hamburgensis</i> X14               | Alphaproteobacteria;                        | Nham 4658              | 92109759  | Nham 4658       | 2           |
| <i>Rhodopseudomonas palustris</i> BisA53          | Rhizobiales                                 | RPE 4142               | 115526136 | RPE 4143        | 1           |
| <i>Cupriavidus taiwanensis</i>                    |                                             | RALTA_A0165            | 188590960 | RALTA_A0166     | 32          |
| <i>Ralstonia eutropha</i> H16                     |                                             | H16_A0221 <sup>2</sup> | 113866252 | H16_A0222       | 31          |
| <i>Burkholderia</i> sp. 383                       |                                             | Bcep18194_B1537        | 78062387  | Bcep18194_B1536 | 2           |
| <i>Bordetella bronchiseptica</i> RB50             |                                             | BB1411                 | 33600397  | BB1412          | 2           |
| <i>Polaromonas naphthalenivorans</i> CJ2          | Betaproteobacteria;                         | Pnap 4633              | 121583364 | Pnap 4634       | 2           |
| <i>Polaromonas</i> sp. JS666                      | Burkholderiales                             | Bpro 5546              | 91791343  | BproDRAFT 4269  | 2           |
| <i>Burkholderia multivorans</i> ATCC 17616        |                                             | Bmul 4194 <sup>1</sup> | 161520740 | Bmul 4193       | 1           |
| <i>Bordetella pertussis</i> Tohama I              |                                             | BP1522 <sup>1</sup>    | 33592613  | BP1523          | 2           |
| <i>Bordetella parapertussis</i> 12822             |                                             | BPP1195 <sup>1</sup>   | 33595868  | BPP1195A        | -4 overlap  |
| <i>Nitrospira multiformis</i> ATCC 25196          | Betaproteobacteria;<br>Nitrospinales        | Nmul_A2209             | 82703327  | Nmul_A2210      | 1           |
| <i>Pelodictyon phaeoclathratiforme</i> BU-1       |                                             | Ppha 1841              | 194336893 | PphaDRAFT 2199  | 12          |
| <i>Chlorobaculum parvum</i> NCIB 8327             | Chlorobia; Chlorobiales                     | Cpar 0602              | 193212269 | Cpar 0601       | 19          |
| <i>Chlorobium limicola</i> DSM 245                |                                             | Clim 1336              | 189346848 | ClimDRAFT 2329  | 130         |
| <i>Desulfovibrio magneticus</i> RS-1              |                                             | DMR 07220              | 239905360 | DMR 07230       | 15          |
| <i>Geobacter uraniireducens</i> Rf4               | Deltaproteobacteria;<br>Desulfuromonadales  | Gura 1299              | 148263367 | Gura 1300       | 2           |
|                                                   |                                             | Gura 1442              | 148263509 | Gura 1441       | -8 overlap  |
|                                                   |                                             | Gura 1411              | 148263479 | Gura 1410       | 25          |
| <i>Syntrophus aciditrophicus</i> SB               | Deltaproteobacteria;<br>Syntrophobacterales | SYN 00016              | 85857883  | SYN 00015       | -21 overlap |
| <i>Escherichia coli</i> K-12 MG1655               |                                             | MqsR (YgiU; b3022)     | 16130918  | YgiT (b3022)    | 1           |
| <i>Escherichia coli</i> IA139                     |                                             | ECIA139_3517           | 218701794 | ECIA139_3516    | 1           |
| <i>Escherichia coli</i> ATCC 8739                 |                                             | EcolC 0675             | 170018724 | EcolC 0676      | 1           |
| <i>Yersinia pseudotuberculosis</i> PB1/+          |                                             | YPTS 3248 <sup>1</sup> | 186896548 | YPTS 3247       | -1 overlap  |
| <i>Yersinia pseudotuberculosis</i> IP 32953       | Gammaproteobacteria;                        | YPTB3124               | 51597437  | YPTB3123        | -1 overlap  |
| <i>Yersinia pseudotuberculosis</i> IP 31758       | Enterobacteriales                           | YpsIP31758_0888        | 153950317 | YpsIP31758_0889 | -1 overlap  |
| <i>Yersinia pestis biovar Microtus</i> str. 91001 |                                             | YP 3580                | 45443315  | hipB4           | -1 overlap  |
| <i>Yersinia pestis</i> Antiqua                    |                                             | YPA 0390               | 108806387 | YPA 0391        | -1 overlap  |
| <i>Yersinia pestis</i> Nepal516                   |                                             | YPN 3081               | 108813241 | YPN 3080        | -1 overlap  |
| <i>Yersinia pestis Pestoides</i> F                |                                             | YPDSF 0633             | 145597939 | YPDSF 0634      | -1 overlap  |
| <i>Yersinia pestis</i> C O92                      |                                             | YPO0882                | 16121189  | YPO0881         | -1 overlap  |
| <i>Pseudomonas putida</i> KT2440                  |                                             | PP4205                 | 26990897  | PP4204          | 2           |
| <i>Pseudomonas putida</i> F1                      |                                             | Pput 1648              | 148546886 | Pput 1649       | 2           |
| <i>Pseudomonas putida</i> GB-1                    | Gammaproteobacteria;                        | PputGB1_3777           | 167034772 | PputGB1_3776    | 2           |
| <i>Pseudomonas putida</i> W619                    | Pseudomonadales                             | PputW619_3529          | 170722693 | PputW619_3528   | 2           |
| <i>Pseudomonas fluorescens</i> Pf-5               |                                             | PFL 105 <sup>3</sup>   | 70728435  | PFL 1052        | -4 overlap  |
| <i>Pseudomonas fluorescens</i> SBW25              |                                             | PFLU1005               | 229588546 | PFLU1004        | -4 overlap  |
| <i>Xylella fastidiosa</i> 9a5c                    |                                             | XF2490                 | 15839080  | XF2491          | 2           |
| <i>Xylella fastidiosa</i> M23                     | Gammaproteobacteria;                        | XfasM23_0362           | 182680924 | XfasM23_0363    | 2           |
| <i>Xylella fastidiosa</i> Temecula1               | Xanthomonadales                             | PD0370                 | 28198287  | PD0371          | 2           |
| <i>Thioalkalivibrio</i> sp. HL-EbGR7              |                                             | Tgr7_1987              | 220935156 | Tgr7_1988       | 24          |

<sup>1</sup> ~40 AA N-terminal truncation

<sup>2</sup> 27 AA N-terminal truncation

<sup>3</sup> 43 AA N-terminal addition

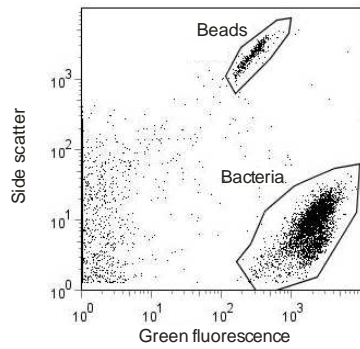

FIG. S1. A representative example of FACS analysis of a mixture of bacteria and microspheres.

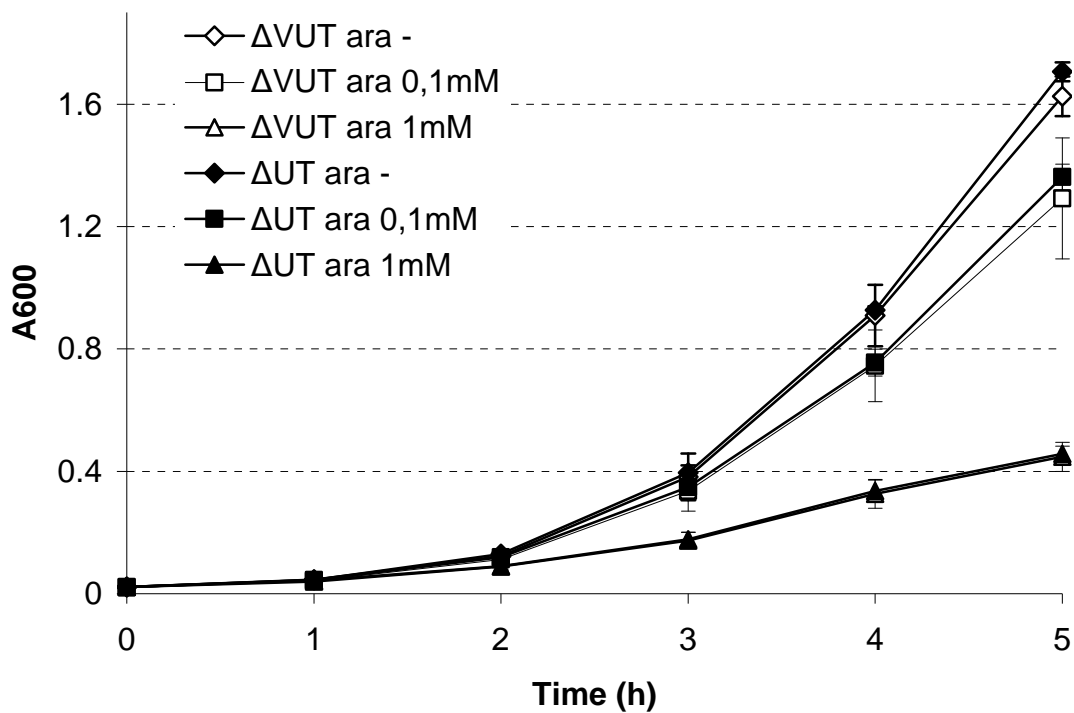

FIG. S2. Deletion of *ygiV* does not affect growth inhibition caused by MqsR in MG1655. Deletion mutants  $\Delta(ygiV mqsR ygiT)$  (open symbols) and  $\Delta(mqsR ygiT)$  (filled symbols) contained plasmids pAT3 for IPTG-inducible *ygiT* expression and pTX3 for L-arabinose-inducible *mqsR* expression. Bacteria were grown overnight, diluted into LB medium and incubated for 2 hours. At time zero, expression of MqsR was induced by addition of 0.1 mM (squares) or 1 mM (triangles) L-arabinose. Controls (diamonds) were incubated without addition of L-arabinose. No IPTG was added to the media. Effect on bacterial growth was measured as  $A_{600}$ . The values are the averages of three independent experiments; error bars indicate the standard deviations.
